# Supplementary material for: Site-selective immobilisation of functional enzymes on to polystyrene nanoparticles
Source: Royal Society of Chemistry journal article supplement (doi:10.1039/b916773k), 2009-12-23
Supplement: b916773k.pdf [file b916773k.pdf]

## Supporting Information

### Site-selective Immobilisation of Functional Enzymes on to Polystyrene Nanoparticles

Lu Shin Wong, Krzysztof Okrasa and Jason Micklefield\*

*School of Chemistry and Manchester Interdisciplinary Biocentre,  
The University of Manchester, 131 Princess Street, Manchester M1 7DN, UK*

*Fax: +44 (0)161-306-8918; Tel: +44 (0)161-306-4509;*

*E-mail: [jason.micklefield@manchester.ac.uk](mailto:jason.micklefield@manchester.ac.uk)*

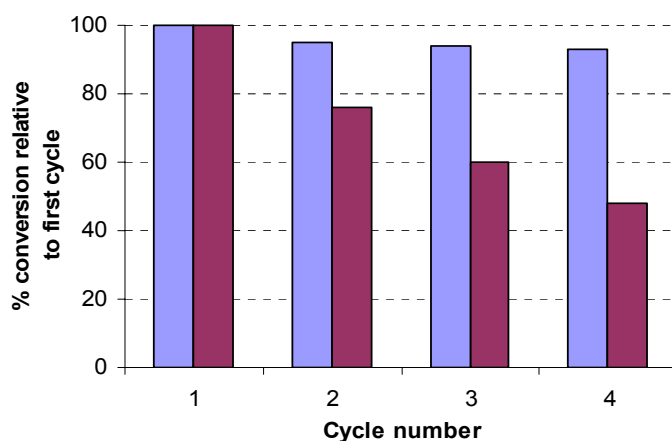

**Figure S1:** Graph of % conversion relative to cycle 1 by immobilised ybbR-AMDase over four reaction cycles where the enzyme was immobilised in the presence of Sfp (blue bars) and with Sfp omitted (red bars).

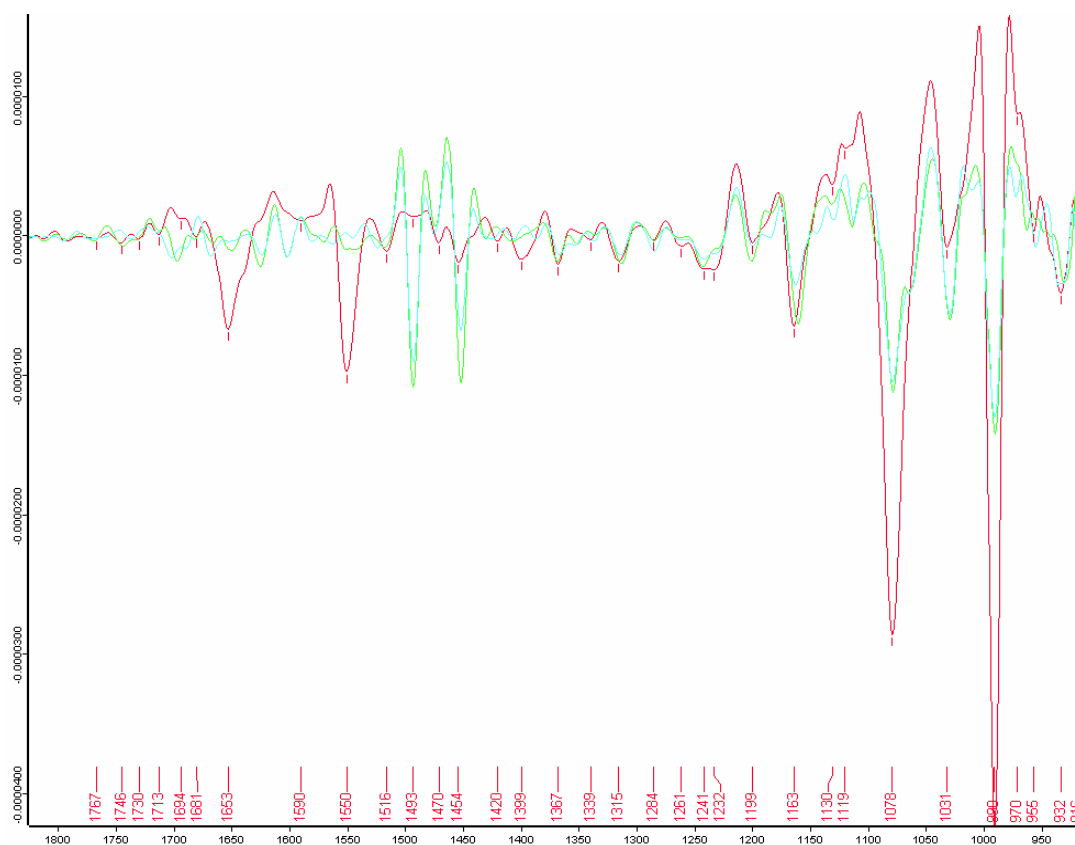

**Figure S2:** Second derivative of the FT-IR spectra of ybbR-AMDase in solution (red), (ybbR-AMDase)-Ppant-NP (green) and CoA-NP (pale blue). The amide I and II bands at 1653 and 1550  $\text{cm}^{-1}$  are extremely small and not easily distinguishable from the background, indicating the amount of protein was at or near the detection limit for this method.
